1 **Title**

2 The interaction between a parasite and sub-optimal temperatures contributes to honey bee  
3 decline

4

5 Davide Frizzera, Laura Andreuzza, Giulia Boaro, Mauro D'Agaro, Simone Del Fabbro, Virginia  
6 Zanni, Desiderato Annoscia, Francesco Nazzi

7

8 Dipartimento di Scienze AgroAlimentari, Ambientali e Animali, Università degli Studi di Udine,  
9 Udine, Italy.

10

11 **Abstract**

12 Global insect decline and, in particular, honey bee colony losses are related to multiple stress  
13 factors, including landscape deterioration, pollution, parasites and climate change. However, the  
14 implications of the interaction among different stress factors for insect health are still poorly  
15 understood; in particular, little is known on how challenging environmental conditions can  
16 influence the impact of parasites. Here we exploited the honey bee as a model system to  
17 approach this problem and carried out extensive lab and field work aiming at assessing how  
18 suboptimal temperatures and parasitic challenges can alter the homeostatic balance of individual  
19 bees and the whole colony, leading to individual death and colony collapse.

20 We found that mite infestation further than increasing the mortality of bees, induces an anorexia  
21 that in turn reduces the capacity of bees to thermoregulate, thus exposing them to the detrimental  
22 effect of lower temperatures. This, in turn, has dramatic implications for the colony as a whole.

23 The results highlight the important role that abiotic factors can have in shaping the effect of  
24 parasitic challenges on honey bees. Furthermore, the multilevel and holistic approach adopted  
25 here can represent a useful template for similar studies on other insect species, which are

26 particularly urgent in view of climate change and the continuous pressure of natural and exotic  
27 parasites on insect populations.

28

29

## 30 **1. Introduction**

31 In recent years, large losses of honey bee colonies have become a global issue<sup>1,2,3</sup>, causing  
32 justified concern in view of the essential pollination service provided by this species<sup>4</sup>. At the  
33 same time, other reports revealed similar problems affecting wild bees<sup>5</sup>, confirming previous  
34 studies dealing with other insects' taxa<sup>6</sup>. In 2017, a long population monitoring study carried out  
35 in Germany highlighted a 76% decline in flying insect biomass<sup>7</sup>; more recently, another long-  
36 term study in the rain forests of Puerto Rico reported biomass losses above 78% for ground-  
37 foraging and canopy-dwelling arthropods<sup>8</sup>. Overall, these latter and other studies indicate that  
38 several insect taxa are experiencing severe losses<sup>6</sup>, which, in view of the ecological role played  
39 by insect in most terrestrial ecosystems, require urgent and careful consideration.

40 It has been suggested that such declines are caused by a number of potential stressors including  
41 habitat loss, pollution, parasites and climate change<sup>6</sup>. However, despite none of these factor  
42 comes in isolation, our knowledge about the possible effect of the combined effect of more  
43 stressors on insect populations is dramatically scarce<sup>9</sup>; in particular, the combination between  
44 biotic and abiotic stressors like adverse environmental conditions is still largely unexplored,  
45 although this latter case appears particularly important in view of the growing importance of  
46 climate change in shaping the already complex interactions within the ecosystems. This lack of  
47 knowledge is not surprising in view of the complexity of the necessary multifactorial studies; for  
48 example, a recent literature survey of insect studies in which different classes of stressors were  
49 manipulated in a full-factorial manner, produced only 133 studies covering 24 stressor pairs,  
50 fewer than ten included three-stressor combinations, and none included more than three  
51 stressors<sup>9</sup>. Under this respect, honey bees offer a unique opportunity in view of the detailed

52 knowledge of their biology, the large suite of molecular tools available since the sequencing of  
53 the honey bee genome<sup>10</sup>, and the relative ease of access and manipulation<sup>11</sup>, notwithstanding the  
54 opportunity of investigating effects at both the individual and colony level.

55

56 In the northern hemisphere, where honey bee colony losses are reported, most of them occur  
57 during the autumn-winter period<sup>12,13,14</sup>. In fact, monitoring programs in the US highlighted a  
58 higher mortality of bee colonies in northern states<sup>15</sup>, and, in some cases, a correlation was found  
59 between winter temperature and colony losses<sup>16</sup>. To our knowledge, in Europe, where extensive  
60 surveys of colony losses were carried out, a similar pattern has not been reported so far, although  
61 published data support the hypothesis that colony losses are somewhat higher in northern Europe  
62 as compared to southern European countries<sup>14</sup>.

63 It has been shown that colony losses are related to the progressive build-up of viral infections  
64 promoted by the increasing *Varroa destructor* infestation<sup>17</sup>. In fact, both mite infestation and  
65 deformed wing virus (DWV) prevalence and abundance gradually increase along the season,  
66 peaking at the end of Summer, when thousands of mites can be present in each colony, DWV  
67 prevalence reaches 100% and viral load in bees can be as high as  $10^{15}$ - $10^{18}$  viral particles per  
68 bee<sup>17</sup>. This in turn, causes increased honey bee mortality, leading to the progressive weakening  
69 of the colony, which eventually collapse during autumn or the following winter<sup>17</sup>.

70 Concurrently, under temperate climatic conditions, a more or less marked decrease of  
71 temperature, according to latitude and continentality, is also observed<sup>18</sup>. However, regardless of  
72 the external fluctuations, nest temperature is constantly maintained around 34-35 °C<sup>19,20,21</sup>; this,  
73 under lower external temperatures, is made possible by the capacity of a conveniently large  
74 cohort of bees to warm up their thorax after consuming an adequate supply of honey<sup>22,23</sup>.

75 Since both the number of bees involved in thermoregulation and their efficiency, as well as the  
76 supply of honey could be influenced by mite infestation, we hypothesized that the capacity of  
77 bees to maintain a convenient nest temperature can be impaired as a result of the increasing mite

78 infestation and asked if and how this can influence the conditions of the bee colony, further  
79 aggravating the already negative impact of the parasite. To this aim, we studied the effect of an  
80 increasing mite infestation and a concurrent low temperature on individual bees and bee  
81 colonies. In general, we aimed at understanding how the influence of a biotic challenge, like a  
82 parasitic mite, can be shaped by an abiotic factor, like environmental temperature, both at the  
83 individual and colony level. This way we wanted to significantly enlarge the growing body of  
84 research about the effects of interacting stress factors on honey bee health<sup>24,25</sup>, eventually  
85 including an environmental factor that has been overlooked so far.  
86

87 **2. Results**

88

89 *2.1. Colony conditions according to mite infestation*

90 To study the effect of the decreasing environmental temperature on honey bee colonies exposed  
91 or not to the parasitic mite *V. destructor*, we established two groups of hives, one of which was  
92 treated with acaricides throughout the trial, to maintain mite infestation at the lowest possible  
93 level, while the other was left untreated until October.

94 As expected, a high number of mites, largely exceeding 5000 parasites in 3 out of the 4 surviving  
95 colonies, was found in the untreated group in October, whereas a significantly lower mite  
96 infestation was recorded in the colonies where an appropriate acaricide treatment was carried out  
97 (Mann-Whitney U test:  $n_1=4$ ,  $n_2=5$ ,  $U=0$ ,  $P = 0.007$ ; Fig. 1a).

98 In turn, higher mite infestation caused increasing viral load in bees belonging to the colonies  
99 where the parasite population was higher. In fact, the proportion of individuals with deformed  
100 wings, a symptom associated to elevated viral infections, was higher in the colonies with higher  
101 parasitic pressure (Mann-Whitney U test:  $n_1=5$ ,  $n_2=5$ ,  $U=0$ ,  $P = 0.005$ ; Fig. 1b).

102 As a result of the increasing mite infestation and the associated viral infection, a higher bee  
103 mortality was observed in the group of colonies suffering from a higher parasitic pressure  
104 (Mann-Whitney U test:  $n_1=4$ ,  $n_2=5$ ,  $U=0$ ,  $P = 0.007$ ; Fig. 1c).

105

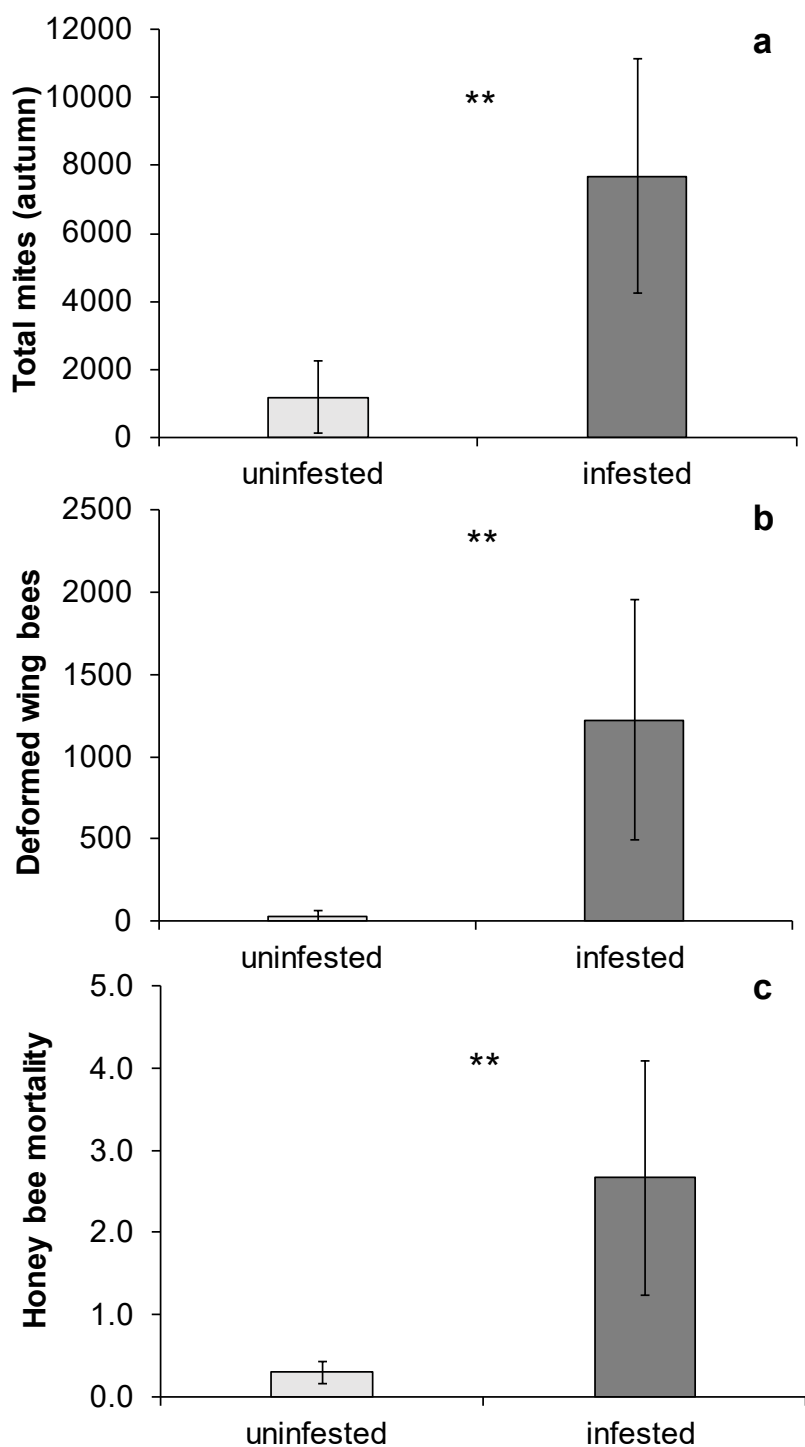

106

107 Figure 1. Effects of mite infestation on honeybee colonies: total mites collected from mite  
108 infested colonies and uninfested colonies after a control treatment (a); total number of deformed  
109 wing bees observed in mite infested and uninfested colonies along the experimental period (b);  
110 honey bee mortality (dead bees\*1000/total bees\*day) recorded in November in mite infested and  
111 uninfested colonies (c).

112 This in turn accelerated seasonal depopulation in mite infested colonies, such that in November a  
113 significantly lower number of bees was found in mite infested colonies as compared to  
114 uninfested ones (Mann-Whitney U test:  $n_1=5$ ,  $n_2=5$ ,  $U=0$ ,  $P = 0.005$ ; Fig. 2a). By October one  
115 mite infested colony had collapsed, soon followed by another two, whereas no losses were  
116 observed in the other group.

117

## 118 *2.2. Temperature control in mite infested colonies*

119 The average daily environmental temperature gradually decreased from August, when 26 °C was  
120 recorded, to November, when it reached 15 °C (Fig. 2b). In the same period, the temperature  
121 inside the hives showed a concurrent, albeit less marked decrease, starting from 35.5 °C  
122 registered in August. However, whilst the internal temperature of control colonies was around 30  
123 °C in November, that of mite infested colonies dropped to 25 °C in the same period (Fig. 2b).

124

125

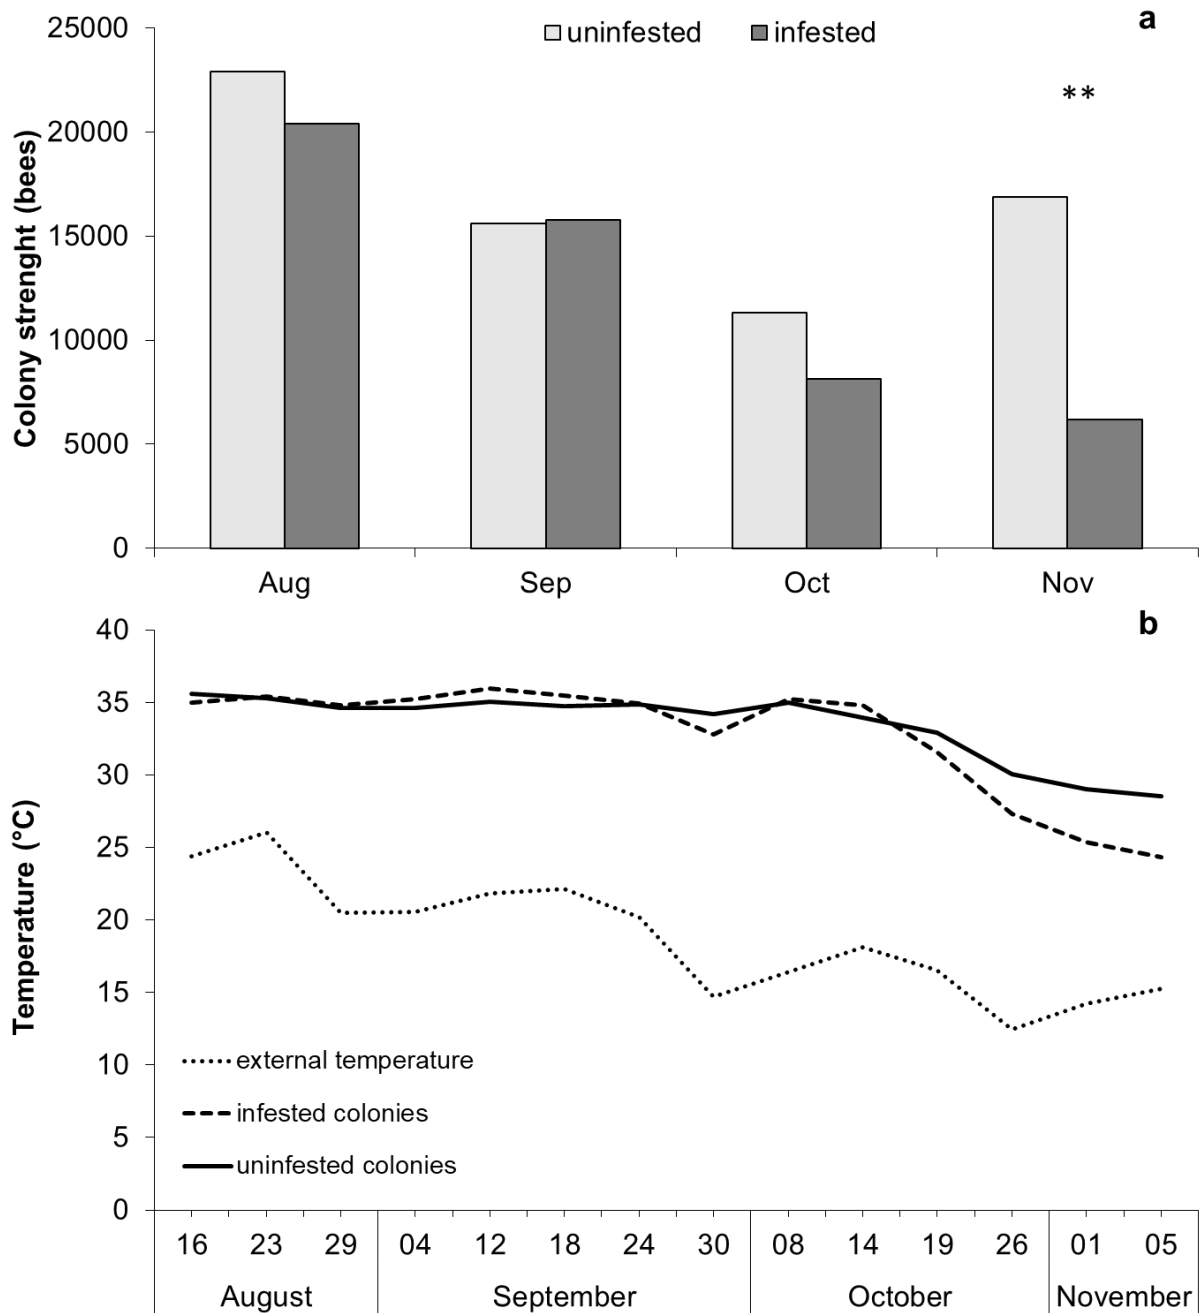

126

127 Figure 2. Estimated number of honey bees recorded during the trial in mite infested and  
128 uninfested colonies (a) and temperature recorded inside mite infested and uninfested colonies  
129 during the trial as compared to the external temperature (b).

130

131 *2.3. The combined effect of low temperatures and mite infestation on individual bees*



132 Since the field trial revealed that the temperature within the nest can be lower than optimal in  
133 both uninfested and mite infested colonies by a few Celsius degrees, we investigated how this  
134 can affect the survival of uninfested bees and bees that were mite infested during the pupal stage.  
135 To this aim, at eclosion, we exposed both mite infested and uninfested adult bees to different  
136 temperature regimes under laboratory conditions and assessed the effect on DWV replication,  
137 survival of bees and expression of some selected genes.

138 As expected, mite infestation significantly influenced viral replication, such that bees parasitized  
139 by one mite during development had a higher viral load as compared to unparasitized bees (two-  
140 way ANOVA test: d.f. = 1,  $F = 16.873$ ,  $P < 0.001$ ; Fig. 3a) while low temperature did not affect  
141 viral dynamics (two-way ANOVA test: d.f. = 1,  $F = 2.799$ ,  $P = 0.106$ ; Fig. 3a).

142

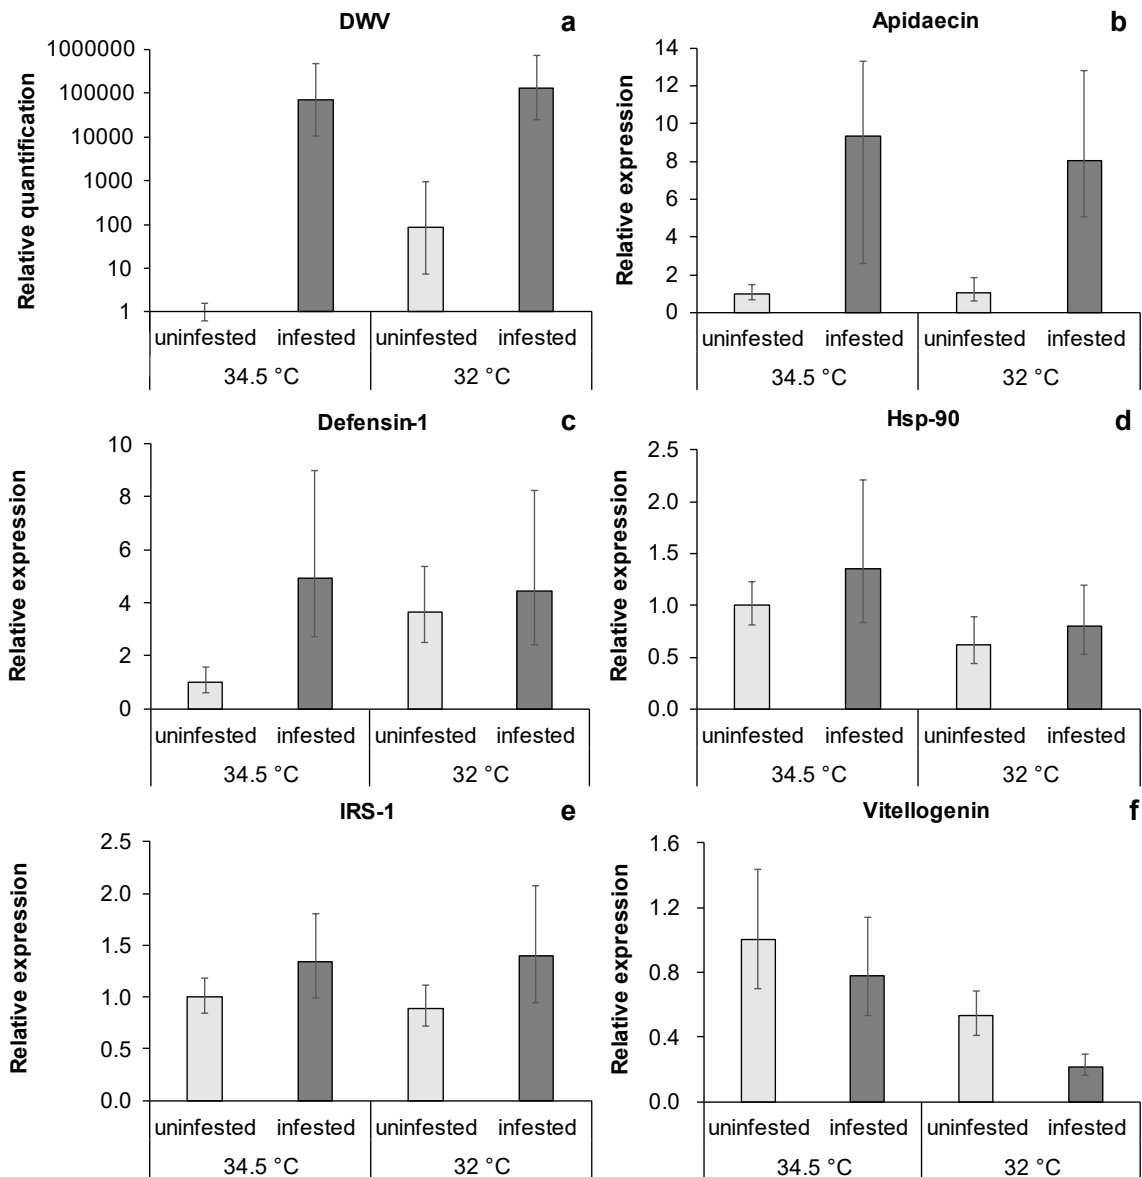

143

144

145 Figure 3. DWV infection (a) and expression of some selected honey bee genes (b-f) as affected  
 146 by mite infestation and low temperature.

147

148 As a result of mite infestation and viral infection, a reduced survival of parasitized bees was  
 149 observed (Cox regression analysis: HR=1.759,  $P < 0.001$ ; Fig. 4); also, a similar but smaller  
 150 effect of a lower rearing temperature was observed (Cox regression analysis: HR=1.274,  $P =$   
 151 0.027; Fig. 4). Interestingly, mite infested bees exposed to low temperatures (i.e. 32 °C) had a  
 152 longevity further reduced in comparison to control bees and bees exposed to either mite

153 infestation or low temperature. Since the interaction between the infestation and low temperature  
154 is not significant (Cox regression analysis: HR=1.153,  $P = 0.516$ ; Fig. 4) the observed reduced  
155 survival seems to be due to an additive effect of the two stressors.

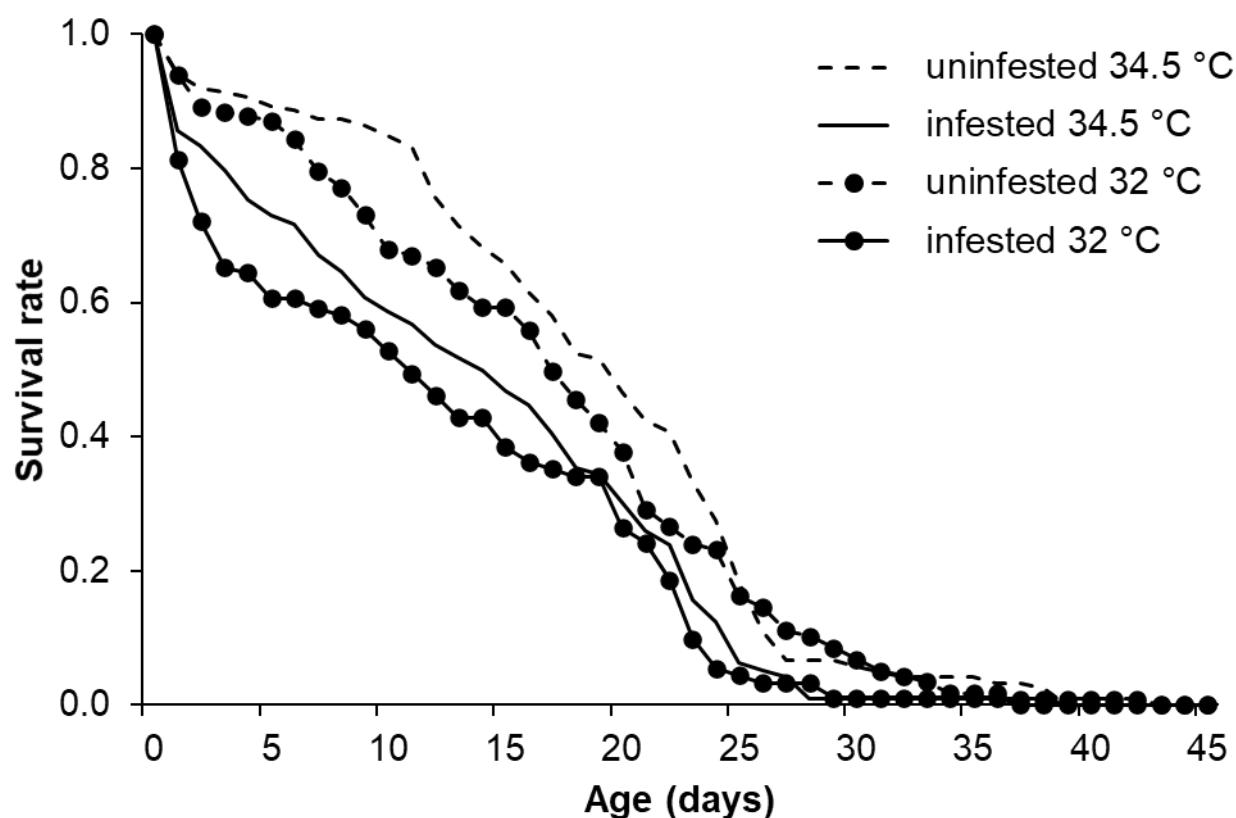

156  
157 Fig. 4. Survival of honey bees exposed to *V. destructor* during the pupal stage and exposed to  
158 two temperature regimes at the adult stage.

159  
160 We also exposed bee pupae to different temperature regimes under laboratory conditions and  
161 assessed the effect on development and survival. We found that the low temperature (i.e. 32 °C)  
162 did not affect the survival of bee pupae (the proportion of eclosing bees from pupae maintained  
163 at 32 and 34.5 °C was 89.1 and 90.3%, respectively); however, all pupae maintained at 32 °C  
164 took 2 days longer than normal to reach the adult stage.  
165 Since honey bees are capable of producing heat in response to low external temperatures by  
166 contracting their thoracic flight muscles, provided that a convenient supply of food is available,

167 we wondered if mite infested bees are as efficient as uninfested bees in this activity when  
168 exposed to a sub-optimal temperature.

169

170 We found that bees infested at the pupal stage did respond less efficiently to a lower temperature  
171 than uninfested bees (Mann-Whitney U test:  $n_1 = 12$ ,  $n_2 = 12$ ,  $U = 19$ ,  $P = 0.001$ ; Fig. 5).

172

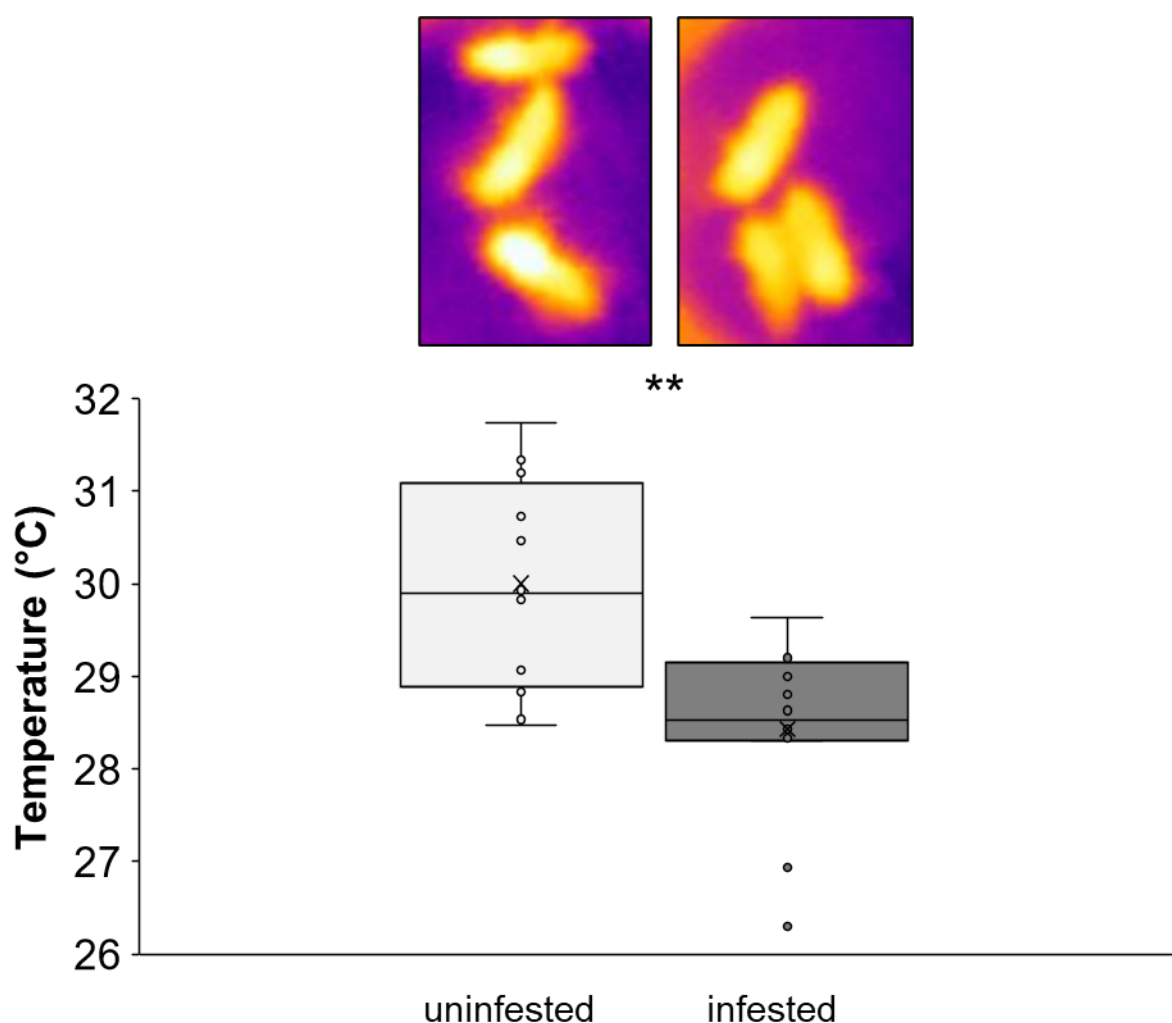

173

174 Figure 5. Average body temperature of mite infested and uninfested honey bees as assessed with  
175 a thermographic camera (FLIR, model i5).

176

177 The feeding activity of *V. destructor* during the pupal stage of bees, normally results in lighter  
178 emerging bees which often display underdeveloped wings, suggesting that some anatomical

179 damage can occur because of the parasitic infestation. We therefore tested the effect of mite  
180 parasitization on the histology and mass of flight muscles in emerging bees. The flight muscles  
181 of bees exposed to mite infestation resulting in deformed wings did not appear to be affected in  
182 comparison to those of unparasitized bees (Fig. 6a). Furthermore, no significant differences were  
183 found between the weight of thorax (where flight muscles are located) of mite infested and  
184 uninfested bees (Mann-Whitney U test:  $n_1 = 10$ ,  $n_2 = 10$ ,  $U = 34$ ,  $P = 0.113$ ; Fig. 6b; Tab. S1).  
185 Instead, the different weight of parasitized bees appeared to be related to the lower amount of  
186 haemolymph that can be found in bees as a result of mite feeding (Fig. 6b, Tab. S1).  
187

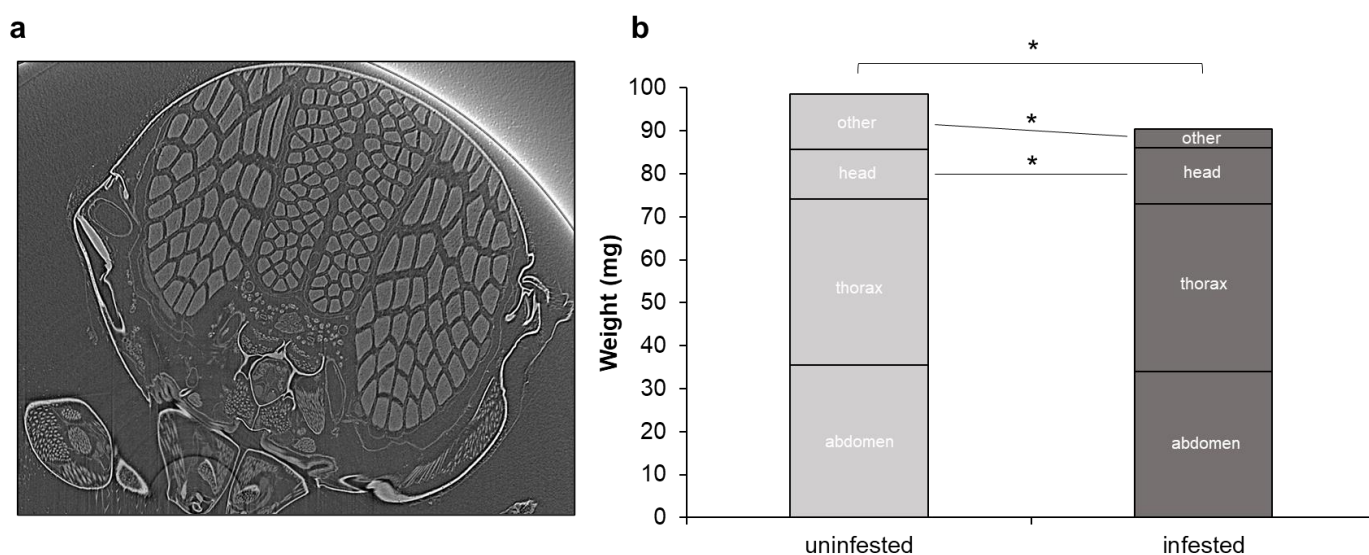

188  
189 Fig. 6. MicroCT scan of DWV symptomatic honey bee thorax (a). Weight of mite infested and  
190 uninfested eclosing honey bees and their body parts; “other” likely represent the weight of the  
191 haemolymph lost after dissection (b).

192  
193 After proving that no anatomical deficit was apparent in mite infested bees, we investigated if a  
194 sufficient amount of nutrients was available to support the metabolic activity of such apparatus  
195 and investigated sugar consumption in mite infested bees as compared to uninfested ones.

196 As expected, we found that, at low temperatures, both uninfested and mite infested bees  
197 increased sugar consumption (two-way ANOVA test: d.f. = 1,  $F = 7.412$ ,  $P = 0.009$ ; Fig. 7);  
198 however, in case of mite infestation, sugar consumption was significantly reduced (two-way  
199 ANOVA test: d.f. = 1,  $F = 21.09$ ,  $P < 0.001$ ; Fig. 7).

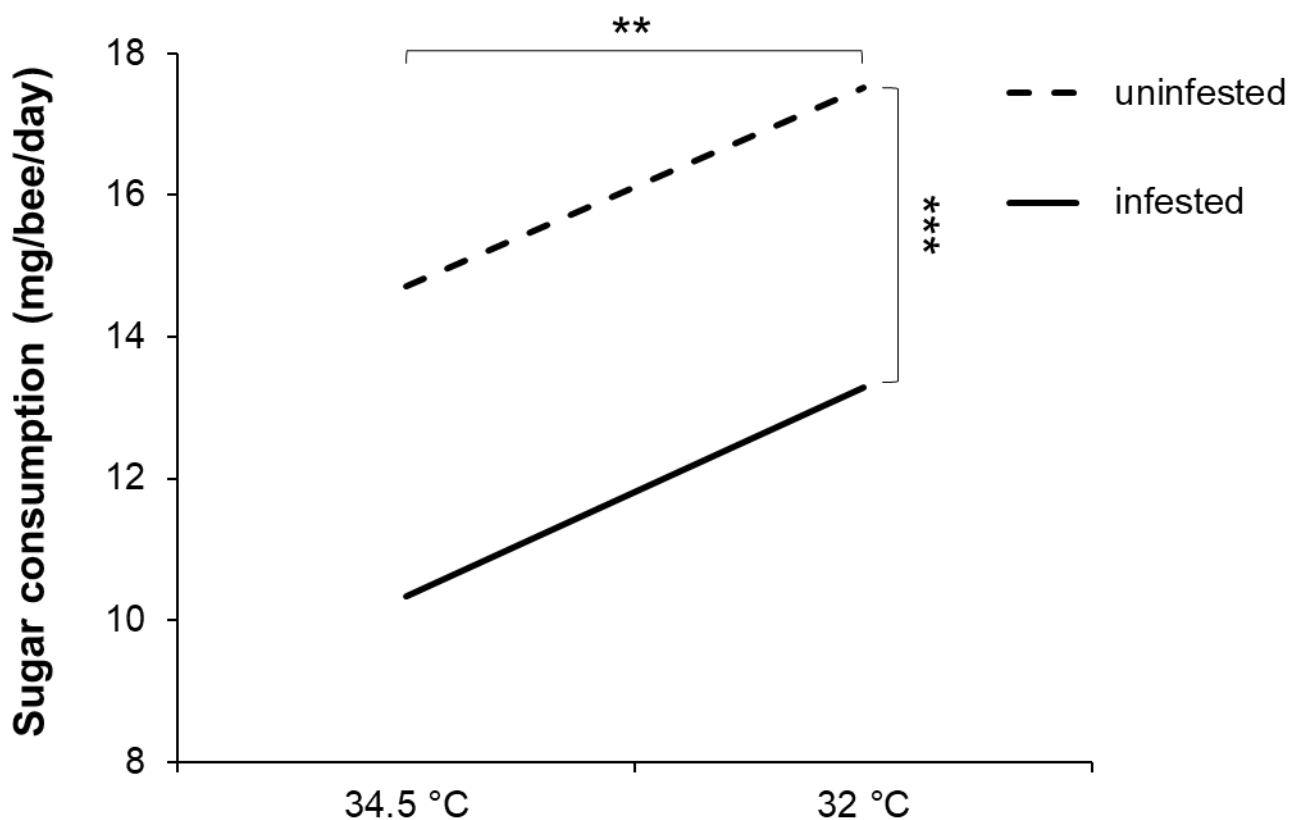

200  
201 Fig. 7. Sugar consumption of mite infested and uninfested bees exposed to two temperature  
202 regimes.

203  
204 To gain insight into the effect of our treatments at the cellular level, we studied the expression of  
205 some genes involved in the response to external stressors, immune challenge and altered  
206 metabolism.

207  
208 The immune gene Apidaecin, encoding an antimicrobial peptide normally elicited in case of mite  
209 infestation, appeared to be up-regulated in mite infested bees (two-way ANOVA test: d.f. = 1,  $F$

210 = 9.599,  $P < 0.001$ ; Fig. 3b) but was not differentially regulated according to temperature (two-  
211 way ANOVA test: d.f. = 1,  $F = 0.002$ ,  $P = 0.965$ ; Fig. 3b). Also Defensin-1, another immune  
212 gene encoding an antimicrobial peptide, was significantly influenced by *Varroa* (two-way  
213 ANOVA test: d.f. = 1,  $F = 4.842$ ,  $P = 0.036$ ; Fig. 3c) but the effect of temperature only  
214 approached statistical significance (two-way ANOVA test: d.f. = 1,  $F = 3.796$ ,  $P = 0.061$ ; Fig.  
215 3c). All other tested genes (i.e. Hsp90, IRS and vitellogenin) showed interesting patterns of  
216 expression, but no significant differences were noted (Figs. 3d, 3e and 3f).

217

### 218 3. Discussion

219 The progressive decline of mite infested honey bee colonies towards the end of Summer is a very  
220 common situation under temperate climates in the Northern Hemisphere and was clearly  
221 confirmed here. In particular, we provided further evidence that this decline is related to the  
222 increased mortality of bees associated to high DWV infection levels caused by the parasitic  
223 activity of the mite *V. destructor*, vectoring the virus and triggering its replication in infected  
224 bees<sup>18,26,27</sup>.

225 We also showed that colony decline parallels the concurrent decrease in environmental  
226 temperature, that is observed in the Autumn months under these climatic conditions. Moreover,  
227 we noted that mite infested honey bee colonies are less efficient at countervailing this decline,  
228 such that sub-optimal temperatures are more often observed in those colonies during this period.  
229 This is likely due both to the reduced number of bees in mite infested colonies and to the reduced  
230 capacity of the surviving bees to thermoregulate, as demonstrated under laboratory conditions.  
231 A detailed laboratory investigation into the effects of the concurrent exposition of bees to a  
232 parasitic infection and sub-optimal temperatures, clearly showed that the negative effects of  
233 these two stressors add up to dramatically reduce the survival of bees. In particular, by recording  
234 the temperature of both mite infested and uninfested adult bees upon exposition to a low  
235 temperature, we noted that the first have a reduced capacity to warm up their bodies to

236 counteract the lowering external temperature: a result that, to our knowledge, has not been  
237 reported before, despite the thermoregulatory capacity of bees has been investigated in  
238 considerable detail<sup>28,29</sup>.

239 Our results suggest that the flight muscles of parasitized bees are normally developed, whereas  
240 the sugar intake of mite infested bees is significantly affected; this suggests that mite infested  
241 bees suffer from a kind of mite induced anorexia. A great deal of research has been dedicated to  
242 the effect of mite infestation on individual bees; however, so far<sup>30,31</sup>, apart from some early  
243 studies on wing development<sup>32</sup> and some recent results regarding the fat body beneath the  
244 feeding hole<sup>33</sup>, little is known about the anatomy of honey bees as affected by mite  
245 parasitization. Here we suggest that, at least as far as the thorax muscles are concerned, the  
246 internal anatomy of infested bee is not impaired. On the other hand, the mite induced anorexia  
247 we report here parallels other cases of disease induced anorexia already observed in insects, and  
248 in particular, the reduced feeding of caterpillar larvae infected by nucleopolyhedrovirus (NPV)<sup>34</sup>.  
249 Furthermore, we observed that the lower temperature inside the hive could affect also the  
250 developmental time and the survival of emerging adult bees.

251 In conclusion, it appears that mite infestation further than increasing *per se* the mortality of bees,  
252 reduces the capacity of bees to thermoregulate, exposing them to the detrimental effect of lower  
253 temperatures. In addition, the reduction in the number of bees engaged in thermoregulation  
254 together with their reduced efficiency, in turn can affect the developing bees further aggravating  
255 the phenomenon. In sum, a number of dangerous positive feed-back loops are generated, with  
256 devastating effects on the survival of the colony, clearly revealed by our field results. Therefore,  
257 it appears that the decreasing temperature observed during the cold season can enhance the  
258 negative effect of the increasing mite infestation, further reducing the survival of bees and thus  
259 impairing the very sustainability of the colony.

260 These results eventually provide some insight into the reported higher colony losses in northern  
261 regions<sup>12,13,14</sup> where lower temperatures are observed during the cold season<sup>16</sup>. Furthermore,



262 these results may provide additional insight into the peculiar world distribution of colony losses.  
263 In 2010, Neumann and Carreck<sup>2</sup> noted that, until that date, large losses of honey bee colonies had  
264 been observed only north of a parallel separating the regions of the world where the mite *V.*  
265 *destructor* had been responsible of severe infestations from those where the mite, albeit present,  
266 had had a reduced impact. They therefore coined the fortunate expression “*Varroa* equator” to  
267 denote that parallel, underlining the crucial role of the mite in the phenomenon of colony losses.  
268 Further studies clearly indicated that the ultimate responsible of the loss of bee colonies observed  
269 in the northern hemisphere is the deformed wing virus, which has a worldwide distribution<sup>35,36</sup>.  
270 Here we would like to further refine the concept of “*Varroa* equator” suggesting that the  
271 occurrence of elevated colony losses north of that parallel is certainly the result of the impact of  
272 the *Varroa*-DWV association on bee colonies but this impact is further exacerbated by the lower  
273 temperatures that are observed in the northern hemisphere in the Autumn months; a situation that  
274 is certainly rarer in the Southern hemisphere where most land masses are distributed north of the  
275 40<sup>th</sup> parallel where milder winters are more common.  
276 Finally and importantly, the results reported here highlight the relevant role that abiotic factors  
277 can have in shaping the effect that biotic factors already exert on the health of honey bees. To  
278 our knowledge this is the first study to deal with the interaction between an abiotic factor such as  
279 environmental temperature and a widespread parasite, in honey bees and insects in general.  
280 Although some conclusions of this study are clearly restricted to honey bees with their peculiar  
281 biology, the experimental approach adopted here (i.e. multilevel and holistic) can represent a  
282 useful template for similar studies on other insect species, aiming at elucidating the critical  
283 positive feed-back loops triggered under these conditions. We hope that similar studies will  
284 become more common in view of the alarming news regarding climate change and its potential  
285 impact on terrestrial ecosystems<sup>37</sup> and the continuous pressure of natural and exotic parasites on  
286 insect populations<sup>38,39</sup>

287

## 288 **4. Materials and methods**

289

### 290 *4.1. Mite infestation and temperature control in the hive*

291

292 Two apiaries, made of 5 colonies each, housed into ten frames Dadant Blatt hives (385 mm x  
293 452 mm x 310 mm), were set up in Udine (Italy); in particular, the untreated apiary was placed  
294 north of the city (46°04'54.2"N, 13°12'34.2"E), while the treated one in south of it (46°02'10.9"N  
295 13°13'24.9"E), about 4 km apart. Previous studies indicated that local colonies are hybrids  
296 between *Apis mellifera ligustica* Spinola and *Apis mellifera carnica* Pollmann<sup>40,41</sup>.

297 In the untreated apiary, no acaricidal treatments were carried out throughout the Summer, so that  
298 mite infestation could naturally increase along the season. In the treated apiary, mite population  
299 was kept under control with different acaricides; in particular, 2 strips of an Amitraz based  
300 product (Amitraz, Laboratorios Calier S.A.) were used in August, followed by three treatments  
301 with a thymol based product in tablets (ApiLife Var, Chemical Laif S.p.A) from September to  
302 mid-October and with 2 strips of a Fluvalinate based product (Apistan, Vita Europe) in October.  
303 Bee population in the experimental hives was estimated, approximately once a month from  
304 August to December, by counting the number of full or partial “sixth of frames” covered by bees  
305 in each hive at sunset, considering that a fully covered sixth of comb corresponds to 253 adult  
306 bees<sup>42</sup>. The number of brood cells was estimated by means of the same method, considering that  
307 one sixth of frame of brood cells corresponds to 728 worker brood cells.

308 During the experiment, infestation levels were estimated by counting the number of mites fallen  
309 on a vaseline coated bottom board. At the end of the first decade of October, highly-infested  
310 hives of the untreated apiary were treated with 2 strips each of a fluvalinate based product. The  
311 total number of mites fallen in the next fifteen days confirmed the higher infestation level of the  
312 untreated hives (Fig. 1a). To assess bee mortality, dead bees found in under basket cages placed

313 in front of the colonies were counted every week from August to November, taking note of the  
314 number of the individuals showing deformed wings.

315 Data collected from the field (i.e. infestation level, proportion of deformed bees, bees' mortality  
316 and decrease of bee population) were analysed using a Mann-Whitney U test.

317

#### 318 *4.2. Temperature measurement in apiary*

319 In order to monitor the temperature inside the hives, a temperature probe (Maxim integrated, US)  
320 was inserted in the central part of each hive during the warmer months (August - September) and  
321 then moved following the honey bee cluster (October - November); monitoring took place from  
322 August to November 2018. At the end of the experiment, data collected by the probes were  
323 transcribed and the average daily temperature with variability coefficient (standard  
324 deviation/mean) calculated.

325 Average daily external temperature data were derived from the regional meteorological  
326 observatory (ARPA FVG – OSMER and GRN, <http://www.meteo.fvg.it/>).

327

#### 328 *4.3. Artificial rearing of bee larvae under different temperatures*

329 Two brood frames containing cells sealed by workers in the preceding 15 hours were collected  
330 from one hive of the experimental apiary of the Dipartimento di Scienze AgroAlimentari,  
331 Ambientali e Animali, University of Udine. Brood frames were transferred into the lab,  
332 uncapped and maintained in a climatic chamber (34.5 °C, 75% R.H.), until the 5<sup>th</sup> instar larvae  
333 emerged from the brood cells; larvae were collected and transferred into 10 cm large Petri  
334 dishes. Half of the larvae were stored in a climatic chamber at 34.5 °C, 75% R.H. and half in a  
335 second chamber at 32 °C, 75 % R.H. Developing larvae were daily monitored and death  
336 individuals removed. The experiment was replicated three times. In total 379 larvae were used  
337 for this experiment.

338

339 *4.4. Artificial infestation of bees*

340 Honey bees and mites were collected from the same experimental apiary cited above. The mites  
341 and last instar bee larvae were collected from brood cells capped in the preceding 15 h obtained  
342 as follows. In the evening of the day preceding the experiment the capped brood cells of several  
343 combs were marked. The following morning the combs were transferred to the lab and unmarked  
344 cells, that had been capped overnight, were unsealed. The comb was then placed in an incubator  
345 at 34.5 °C and 75% R.H., where larvae and mites spontaneously emerged. Last instar bee larvae  
346 were transferred into gelatin capsules (Agar Scientific ltd., 6.5 mm diameter) with no mites  
347 (uninfested bees) or 1 mite (infested bees) and maintained at 34.5 °C, 75% R.H. for 12 days<sup>43</sup>.

348

349 *4.5. Honey bee rearing under artificial conditions*

350 Upon eclosion, newly emerged adult bees were separated from the infesting mite and transferred  
351 into four plastic cages (185 × 105 × 85 mm) with water and sugar candy (Apifonda®), supplied  
352 *ad libitum* through a small plastic container (Ø = 1.5 cm), refilled every 2 days and placed on the  
353 floor of the cages. To prevent the exsiccation of the candy, containers were wrapped with  
354 laboratory film (Parafilm®); a small cut was made on the top, to ensure bee feeding. Two cages,  
355 one with bees that were mite infested at the pupal stage and the other with the same number of  
356 uninfested bees were maintained in a climatic chamber at 34.5 °C, 75% R.H.; the other two  
357 cages were maintained in a climatic chamber at 32 °C, 75% R.H.; each cage hosted from 20 to  
358 25 adult bees. Bee survival and diet consumption were recorded daily.

359 Seven days after the eclosion, at least eight bees per treatment were collected, killed with liquid  
360 nitrogen and stored at -80 °C until analysis. The experiment was repeated six times from July to  
361 September. In total, from 112 to 134 bees per group were used.

362 The hazard ratio was calculated by means of a weighted cox regression hazard model<sup>44</sup> using R,  
363 version 3.6.2<sup>45</sup>.

364 Sugar candy intake under different conditions was monitored from day 3 after the emergence of  
365 bees to day 15 and normalized according to the different weights of infested and control bees<sup>39</sup>.  
366 Sugar consumption under different treatments was normalized and analysed by means of a two-  
367 way ANOVA test.

368

#### 369 *4.6. Honey bee thermoregulation*

370 To test if mite infested bees thermoregulate as well as uninfested bees, honey bee larvae were  
371 artificially infested using the protocol described above<sup>43</sup> or maintained uninfested as a control.  
372 Upon eclosion, newly emerged adult bees were separated from the infesting mite and transferred  
373 into plastic cages (185 × 105 × 85 mm). Uninfested and mite-infested honey bees were  
374 maintained in a climatic chamber at 34.5 °C, 75% R.H.  
375 Starting from day 4, three honey bees collected randomly from the two groups (mite-infested and  
376 uninfested) were placed in polystyrene box, transferred to room temperature (25 °C) and  
377 photographed with an infrared thermographic camera (brand: FLIR; model: i5; thermal  
378 resolution = ± 0.1 °C) with emissivity settled at 0.97<sup>47</sup>. Pictures were taken through a hole in the  
379 polystyrene lid to reduce the possible interference of light radiation. Pictures were taken for four  
380 consecutive days with three technical replicates (i.e. three pictures) for each time point. Images  
381 were analysed with FLIR Tools® software and temperature data were collected, considering the  
382 average value of the warmer part of the bee which always corresponded to thorax. The area used  
383 to calculate the mean temperature was equal for each bee.

384 The recorded temperatures were compared using the Mann-Whitney U test.

385

#### 386 *4.7. Honey bee weight*

387 To check the condition of flight muscles of experimental bees, we artificially infested or not  
388 honey bee larvae as described before. The two groups of bees (uninfested and infested) were  
389 maintained in a climatic chamber at 34.5 °C, 75% R.H., dark, for 12 days. Upon eclosion, newly

390 emerged honey bees were weighted and dissected into head, thorax and abdomen; then, each  
391 section was separately weighted.

392 The weight of the different body parts of mite infested and uninfested bees was compared with  
393 the Mann-Whitney U test. In total, 10 uninfested and 10 mite infested bees were used.

394

#### 395 *4.8. Gene expression analysis and DWV quantification*

396 Sampled bees were defrosted in RNAlater (Ambion®) and gut deprived. The whole body of the  
397 bees was homogenized by means of mortar and pestle in liquid nitrogen. Total RNA was  
398 extracted from each bee, according to the method suggested by the producer of RNeasy Plus  
399 mini kit (Qiagen®, Germany). The amount of RNA in each sample was quantified using a  
400 NanoDrop® spectrophotometer (ThermoFisher™, US) and integrity verified by means of agarose  
401 gel electrophoresis. cDNA was synthesized starting from 500 ng of RNA following the  
402 manufacturer specifications (PROMEGA, Italy). Additional negative control samples containing  
403 no RT enzyme were included. Ten ng of cDNA from each sample were analysed by qRT-PCR  
404 with the primers reported in Table 1, using SYBR®green dye (Ambion®), according to the  
405 manufacturer specifications, on a BioRad CFX96 Touch™ Real time PCR Detector. Primers  
406 efficiency was calculated according to the formula  $E=10^{(-1/\text{slope})-1} * 100$ . The following  
407 thermal cycling profiles were adopted: one cycle at 95 °C for 10 minutes, 40 cycles at 95 °C for  
408 15s and 60 °C for 1 min, and one cycle at 68 °C for 7 min.

409 Relative gene expression data were analysed using the  $2^{-\Delta\Delta C_t}$  method<sup>48</sup> using actin and  
410 GAPDH as housekeeping genes. Relative expression data were transformed, normalized and  
411 analysed by means of two-way ANOVA test performed with R statistical software, version 3.6.2.  
412 (R Core Team, 2019). At least eight individual bees per experimental group were analysed.

413

| Name | Sequence | Reference |
|------|----------|-----------|
|------|----------|-----------|

|                       |                          |    |
|-----------------------|--------------------------|----|
| Actin, forward        | GATTTGTATGCCAACACTGTCCTT | 49 |
| Actin, reverse        | TTGCATTCTATCTGCGATTCCA   |    |
| GAPDH, forward        | GCTGGTTTCATCGATGGTTT     | 50 |
| GAPDH, reverse        | ACGATTTTCGACCACCGTAAC    |    |
| DWV, forward          | GGTAAGCGATGGTTGTTTG      | 51 |
| DWV, reverse          | CCGTGAATATAGTGTGAGG      |    |
| Apidaecin, forward    | TTTTGCCTTAGCAATTCTTGTTG  | 52 |
| Apidaecin, reverse    | GAAGGTTCGAGTAGGCCGATCT   |    |
| Defensin-1, forward   | TGCGCTGCTAACTGTCTCAG     | 52 |
| Defensin-1, reverse   | AATGGCACTTAACCGAAACG     |    |
| Vitellogenin, forward | TTGACCAAGACAAGCGGAACT    | 53 |
| Vitellogenin, reverse | AAGGTTCTGAATTAACGATGAA   |    |
| Hsp-90, forward       | CATGGCTAATGCCGGAGAGG     | 54 |
| Hsp-90, reverse       | CTGCACCAGCTTGAAGAGC      |    |
| IRS-1, forward        | TTTGCAGTCGTTGCTGGTA      | 55 |
| IRS-1, reverse        | TAGCGGTAGTGGCACAGTTG     |    |

414 Table 1. Primer pairs used in this study.

415

## 416 **5. Acknowledgements**

417

418 This research was funded by the European Union's Horizon 2020 research and innovation  
419 programme, under grant agreement No 773921 (PoshBee) and by the Italian Ministry of  
420 University, PRIN 2017 - UNICO (2017954WNT). The microCT scan images were carried out at  
421 Elettra Synchrotron Light Laboratory in Trieste (Italy) within the framework of proposal n.  
422 20190281. Authors would like to thank Prof. Alessandro Peressotti for the concession of the  
423 thermographic camera used in this article.

424

## 425 **6. Author contributions**

426

427 D.A. D.F. F.N. designed the research; L.A., D.A., G.B., M.D.A., S.D.F., D.F., F.N., V.Z.  
428 performed the research; D.A., D.F., F.N., V.Z., analyzed the data; D.A. D.F. F.N. wrote the  
429 paper. All authors revised the final version of the manuscript.

430

## 431 **7. References**

432

- 433 1. Le Conte, Y., Ellis, M., Ritter, W. *Varroa* mites and honey bee health: can *Varroa*  
434 explain part of the colony losses? *Apidologie* **41**, 353–363 (2010).
- 435 2. Neumann, P., Carreck, L. Honey bee colony losses. *J. Apic. Res.* **49**, 1–6 (2010).
- 436 3. Potts, S.G. *et al.* Global pollinator declines: trends, impacts and drivers. *Trends Ecol.*  
437 *Evol.* **25**, 345–353 (2010).
- 438 4. Klein, A-M., *et al.* Importance of pollinators in changing landscapes for world crops.  
439 *Proc. R. Soc. B* **274**, 303–313 (2006). doi:10.1098/rspb.2006.3721
- 440 5. Cameron S.A. *et al.* Patterns of widespread decline in North American bumble bees.  
441 *Proc. Natl. Acad. Sci. USA.* **108**, (2) 662–667 (2011). doi:10.1073/pnas.1014743108



- 442 6. Sánchez-Bayo, F., Wyckhuys K.A.G. Worldwide decline of the entomofauna: A review  
443 of its drivers. *Biol. Conserv.* **232**, 8–27 (2019). doi:10.1016/j.biocon.2019.01.020
- 444 7. Hallmann, C.A. *et al.* More than 75 percent decline over 27 years in total flying insect  
445 biomass in protected areas. *PLoS One*, 12 (10): e0185809 (2017).  
446 doi:10.1371/journal.pone.0185809
- 447 8. Lister, B.C., Garcia, A. Climate-driven declines in arthropod abundance restructure a  
448 rainforest food web. *Proc. R. Soc. B.* **115**, (44) E10397–E10406 (2018).
- 449 9. Kaunisto, S., Ferguson, L.V., Sinclair, B.J. Can we predict the effects of multiple  
450 stressors on insects in a changing climate. *Cur. Opin. Insect. Sci.* **17**, 55–61 (2016).
- 451 10. Grozinger, C.M. and Robinson, G.E. The power and promise of applying genomics to  
452 honeybee health. *Cur. Opin. Insect. Sci.* **10**, 124–132 (2015).
- 453 11. Page, R.E. The COLOSS BEEBOOK Volume I—Foreword. *J. Apic. Res.* **52**, 4 1–2  
454 (2013).
- 455 12. Amdam, G.V., Hartfelder, K., Norberg, K., Hagen, A., Omholt, S.W. Altered physiology  
456 in worker honey bees (Hymenoptera: Apidae) infested with the mite *Varroa destructor*  
457 (Acari: Varroidae): A factor in colony loss during overwintering? *J. Econ. Entomol.* **97**,  
458 741–747 (2004).
- 459 13. Genersch, E. *et al.* The German bee monitoring project: a long term study to understand  
460 periodically high winter losses of honey bee colonies. *Apidologie* **41**, 332–352 (2010).
- 461 14. Jacques, A. *et al.* A pan-European epidemiological study reveals honey bee colony  
462 survival depends on beekeeper education and disease control. *PLoS One* **12**, e0172591  
463 (2017).
- 464 15. Kulhanek, K. *et al.* A national survey of managed honey bee 2015–2016 annual colony  
465 losses in the USA. *J. Apic. Res.* **56**, 328–340 (2017).
- 466 16. vanEngelsdorp, D., Hayes, J., Underwood, R.M., Pettis, J. A. Survey of Honey Bee  
467 Colony Losses in the U.S., Fall 2007 to Spring 2008. *PLoS One* **3**, 12, 1–6 (2008).

- 468 17. Nazzi, F. *et al.* Synergistic parasite pathogen interactions mediated by host immunity can  
469 drive the collapse of honeybee colonies. *PLoS Path.* **8**, e1002735 (2012).
- 470 18. Britannica, The Editors of Encyclopaedia. "Learn what is a climate in geography".  
471 Encyclopedia Britannica, 29 Apr. 2021, [https://www.britannica.com/summary/climate-](https://www.britannica.com/summary/climate-meteorology)  
472 [meteorology](https://www.britannica.com/summary/climate-meteorology).
- 473 19. Seeley, T.D., Heinrich, B. The Mechanisms and Energetics of Honeybee Swarm  
474 Temperature Regulation. *J. Exp. Biol.* **91**, 25–55 (1981).
- 475 20. Bujok, B., Kleinhenz, M., Fuchs, S., Tautz, J. Hot spots in the bee hive.  
476 *Naturwissenschaften* **89**, 299–301 (2002).
- 477 21. Kleinhenz, M., Bujok, B., Fuchs, S., Tautz, J. Hot bees in empty broodnest cells: heating  
478 from within. *J. Exp. Biol.* **206**, 4217–4231 (2003).
- 479 22. Sacktor, B. Regulation of intermediary metabolism with special reference to the control  
480 mechanisms in insect flight muscle. *Adv. Insect. Physiol.* **7**, 267–347 (1970).
- 481 23. Rothe, U., Nachtigall, W. Flight of the honey bee. IV Respiratory quotients and  
482 metabolic rates during sitting, walking and flying. *J. Comp. Physiol. B* **158**, 739–749  
483 (1989).
- 484 24. Nazzi, F., Pennacchio, F. Disentangling multiple interactions in the hive ecosystem.  
485 *Trends Parasitol.* **30**, 556–561 (2014).
- 486 25. Goulson, D., Nicholls, E., Botías, C., Rotheray, E.L., Bee declines driven by combined  
487 stress from parasites, pesticides, and lack of flowers. *Science*, **347**, 1255957 (2015).
- 488 26. de Miranda, J.R., Genersch, E. Deformed wing virus. *J. Invertebr. Pathol.* **103**, S48–S61  
489 (2010).
- 490 27. Annoscia, D. *et al.* Haemolymph removal by *Varroa* mite destabilizes the dynamical  
491 interaction between immune effectors and virus in bees, as predicted by Volterra's  
492 model. *Proc. R. Soc. B.* **286**, 20190331 (2019).

- 493 28. Free, J.B., Spencer-Booth, Y. Chill-coma and cold death temperatures of *Apis mellifera*.  
494 Ent. Exp. et Ap. **3**, 222–230 (1960).
- 495 29. Heinrich, B. The hot-blooded insects: mechanisms and evolution of thermoregulation.  
496 (Cambridge: Harvard University Press, 1993).
- 497 30. Rosenkranz, P., Aumeier, P., Ziegelmann, B. Biology and control of *Varroa destructor*.  
498 J. Invertebr. Pathol. **103**, S96–S119 (2010).
- 499 31. Nazzi, F. Le Conte, Y. Ecology of *Varroa destructor*, the major ectoparasite of the  
500 western honey bee, *Apis mellifera*. Annu. Rev. Entomol. **61**, 417–432 (2016).
- 501 32. de Miranda, J.R., Genersch, E. Deformed wing virus. J. Invertebr. Pathol. **103**, S48–S61  
502 (2010).
- 503 33. Ramsey, S.D. *et al.* *Varroa destructor* feeds primarily on honey bee fat body tissue and  
504 not hemolymph. Proc. Natl. Acad. Sci. USA. **116**, 1792–1801 (2019).
- 505 34. Povey, S., Cotter, S.C., Simpson, S.J., Wilson, K. Dynamics of macronutrient self-  
506 medication and illness-induced anorexia in virally infected insects. J. Anim. Ecol. **83**,  
507 245–255 (2013).
- 508 35. Wilfert L. *et al.* Deformed wing virus is a recent global epidemic in honeybees driven by  
509 *Varroa* mites. Science **351**, 594–597 (2016).
- 510 36. Grozinger, M.C., Flenniken, M.L. Bee Viruses: Ecology, Pathogenicity, and Impacts.  
511 Annu. Rev. Entomol. **64**, 205–226 (2019).
- 512 37. Connor, N, *et al.* Past and future global transformation of terrestrial ecosystems under  
513 climate change. Science **361**, 6405, 920–923 (2018).
- 514 38. Cunningham, A.A., Daszak, P., Rodríguez, J.P. Pathogen Pollution: defining a  
515 parasitological threat to biodiversity conservation. J. Parasitol. **89**(Supplemental), S78–  
516 S83 (2003).
- 517 39. Daszak, P., Cunningham, A.A., Hyatt, A.D. Wildlife ecology—emerging infectious  
518 diseases of wildlife—threats to biodiversity and human health. Sci. **287**, 443–449 (2000).

- 519 40. Comparini, A., Biasiolo, A. Genetic characterization of Italian bee *Apis mellifera*  
520 *ligustica* Spin, versus Carnolian bee, *Apis mellifera carnica* Poll, by allozyme variability  
521 analysis. *Biochem. Syst. Ecol.* **19**, 189–194 (1991).
- 522 41. Nazzi, F. Fluctuation of forewing characters in hybrid honey bees from northeastern  
523 Italy. *J. Apic. Res.* **31**, 1 (1992).
- 524 42. Marchetti S. Il “metodo dei sestii” per la valutazione numerica degli adulti in famiglie di  
525 *Apis mellifera*. *L. Apicoltura* **1**, 41–61 (1985).
- 526 43. Nazzi, F., Milani N. A technique for reproduction of *Varroa jacobsoni* Oud. under  
527 laboratory conditions. *Apidologie* **25**, 579–584 (1994).
- 528 44. Dunkler, D., Ploner, M., Schemper, M., Heinze, G. Weighted Cox regression using the R  
529 package *coxphw*. *J. Stat. Softw.* **84**, Issue 2 (2018).
- 530 45. R Core Team (2019) R: a language and environment for statistical computing. Available  
531 from <https://www.R-project.org/>
- 532 46. Annoscia, D., Del Piccolo, F., Covre, F., Nazzi, F. How does the mite *Varroa destructor*  
533 kill the honeybee *Apis mellifera*? Alteration of cuticular hydrocarbons and water loss in  
534 infested honeybees *J. Insect Physiol.* **58**, 1548–1555 (2015).
- 535 47. Stabentheiner, A., Kovac, H., Brodschneider, R. Honeybee Colony Thermoregulation  
536 Regulatory Mechanisms and Contribution of Individuals in Dependence on Age,  
537 Location and Thermal Stress. *PLoS One* **5**, e8967 (2010).
- 538 48. Livak, K.J., Schmittgen, T.D. Analysis of relative gene expression data using Real Time  
539 Quantitative PCR and the  $2^{-\Delta\Delta CT}$  method. *Methods* **25**, 402–408 (2001).
- 540 49. Di Prisco, G. *et al.* A mutualistic symbiosis between a parasitic mite and a pathogenic  
541 virus undermines honey bee immunity and health. *Proc. Natl. Acad. Sci. USA* **113**, 3203–  
542 3208 (2016).

- 543 50. Huang, Q., Kryger, P., Le Conte, Y., Moritz, R.F.A. Survival and immune response of  
544 drones of a Nosemosis tolerant honey bee strain towards *N. ceranae* infections. *J.*  
545 *Invertebr. Pathol.* **109**, 297–302 (2012).
- 546 51. Mondet, F., de Miranda, J.R., Kretzschmar, A., Le Conte, Y., Mercer, A.R. On the Front  
547 Line: Quantitative Virus Dynamics in Honeybee (*Apis mellifera* L.) Colonies along a  
548 New Expansion Front of the Parasite *Varroa destructor*. *PLoS Pathog.* **10**, e1004323  
549 (2014).
- 550 52. Evans, J.D. *et al.* Immune pathways and defence mechanisms in honey bees *Apis*  
551 *mellifera*. *Insect Mol. Biol.* **15**, 645–656 (2006).
- 552 53. Fischer, P., Grozinger, C.M. Pheromonal regulation of starvation resistance in honey bee  
553 workers (*Apis mellifera*). *Naturwissenschaften* **95**, 723 (2008).
- 554 54. McKinstry, M., Chung, C., Truong, H. The heat shock response and humoral immune  
555 response are mutually antagonistic in honey bees. *Sci. Rep.* **7**, 8850 (2017).
- 556 55. Mutti, N.S. *et al.* IRS and TOR nutrient-signaling pathways act via juvenile hormone to  
557 influence honey bee caste fate. *J. Exp. Biol.* **214**, 3977–3984 (2011).
- 558
